# Supplementary material
Source: Elsevier journal article supplement (https://comptes-rendus.academie-sciences.fr/biologies/article/10.1016/j.crvi.2013.06.003/file/attach/mmc1.pdf)
Supplement: mmc1 [file mmc1.pdf]

*Supplementary material to: "Gymnocranius superciliosus and G. satoi, two new large-eye breams (Sparoidea: Lethrinidae) from the Coral Sea and adjacent regions"*

*Philippe Borsa, Philippe Béarez, Sobar Paijo and Wei-Jen Chen*

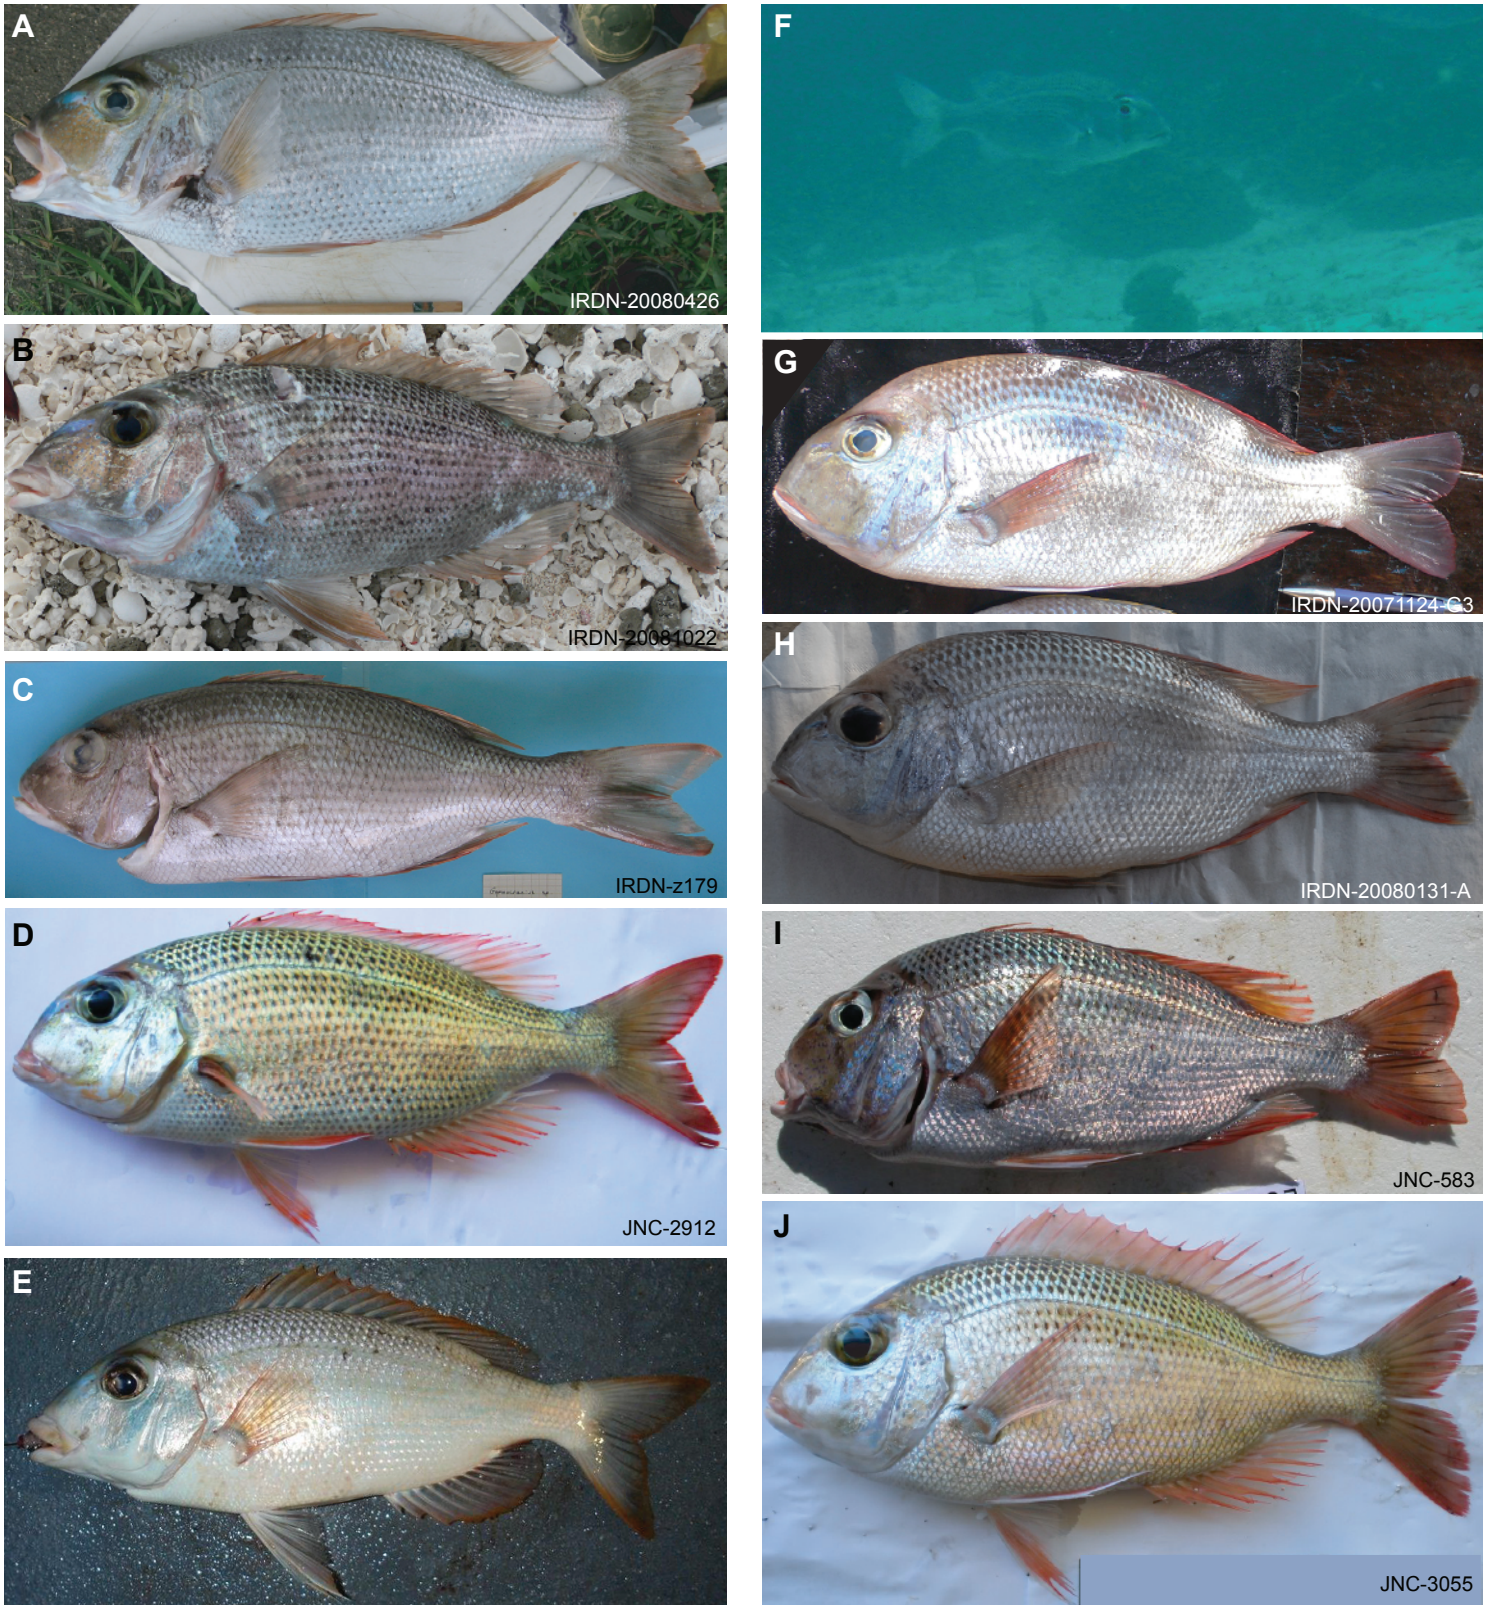

**Fig. S1** Large-eye bream specimens examined for the present study, other than type material. **A** *Gymnocranius superciliosus* sp. nov., IRDN- 20080426, from coral sandy bottom (depth 7 m) off Pindai, northwestern lagoon, New Caledonia, 26 April 2008; caught by A. Cheype (IRD, Nouméa) using a speargun; neurocranium preserved (photograph: P. Borsa / IRD). **B** *Gymnocranius superciliosus* sp. nov., IRDN-20081022, from coral sandy bottom (depth 5 m) of Loop Islet in the southern lagoon of the Chesterfield islands, Coral Sea, 22 October 2008; caught by J. Palene (Marine nationale, Nouméa) using a speargun (photograph: P. Borsa / IRD). **C** *Gymnocranius superciliosus* sp. nov., IRDN-z179 from the northern lagoon of New Caledonia; purchased from the Noumea fish market by P. Borsa, 21 December 2004; neurocranium preserved (photograph: A. Collet / IRD). **D** *Gymnocranius superciliosus* sp. nov., JNC-2912, from the sandy bottom north of Tomboo Reef (depth 20-30 m), southwestern lagoon, New Caledonia, 21 April 2009; caught by handline by J.-L. Justine, N. Colombani and M. Briand (IRD, Noumea); neurocranium preserved (photograph: J.-L. Justine / IRD). **E** *Gymnocranius superciliosus* sp. nov., southwestern lagoon of Nukufetau Atoll, Tuvalu, 21 April 2007; caught by handline on a "small patch reef surrounded by sand at 15-20 m depth" (photograph: C.A.J. Duffy / Department of Conservation, Auckland). **F** *Gymnocranius superciliosus* sp. nov., specimen sighted underwater one meter above the coral sandy bottom (depth: 22 m) off Pulau Fam, West Papua, 02 December 2007 (photograph: P. Borsa / IRD / LIPI Ekspedisi Widya Nusantara). **G** *Gymnocranius satoi* sp. nov., specimen IRDN-20071124-G3 from Raja Ampat, West Papua; sampled at the Sorong fish market by S.P., 24 November 2007; fin clip preserved (photograph: S.P. / BioKor). **H** *Gymnocranius satoi* sp. nov., IRDN-20080131-A, Lesser Sunda islands; sampled at the Kedongan fish market by F. Giancarlo and C. Cristofoli, 31 January 2008; fin clip preserved (photograph: F. Giancarlo / BioKor). **I** *Gymnocranius satoi* sp. nov., JNC-583, from the sandy bottom of Le Sournois Reef (depth 20-40 m), southwestern lagoon, New Caledonia (22°31'S, 166°26'E), 01 July 2003; caught by handline by J.-L. Justine and students (photograph: J.-L. Justine / IRD). **J** *Gymnocranius satoi* sp. nov., JNC-3055, from the coral sandy bottom (depth 20-40 m) of the pass east of Tomboo Reef, southwestern lagoon, New Caledonia (22°34'S 166°29'E), 16 September 2009; caught by handline by J.-L. Justine, C. Schoelincq, É. Henry and S. Tereua; tissue preserved (photograph: J.-L. Justine / IRD).
